# Supplementary material
Source: ML conference proceedings conference paper supplement (https://openreview.net/forum?id=XgS9YPYtdj)

Error on new task [%]

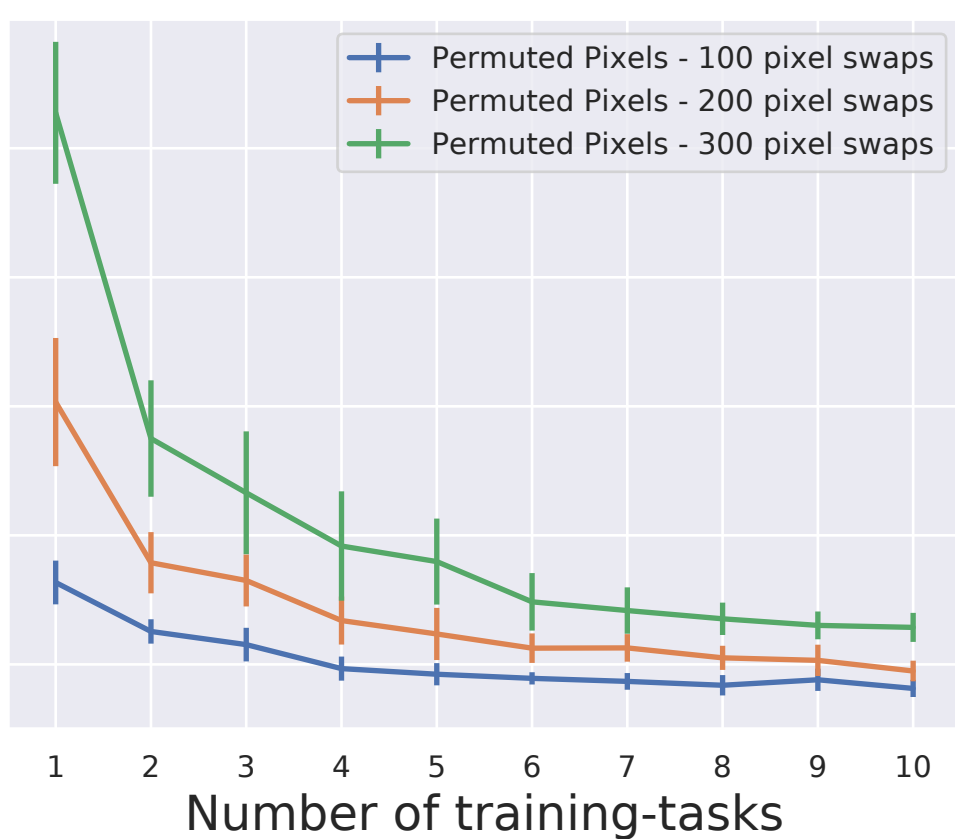

Supplement: supplementary_material [file attachment]

Bound on new task

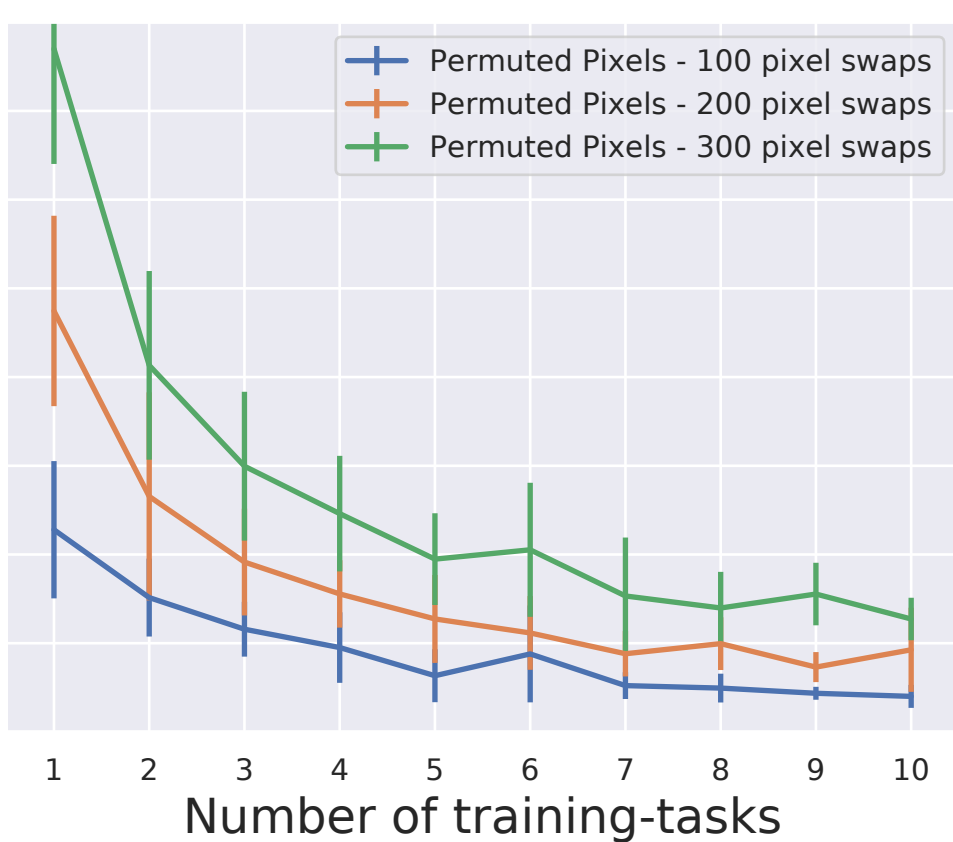

Supplement: supplementary_material [file attachment]

Bound on new task

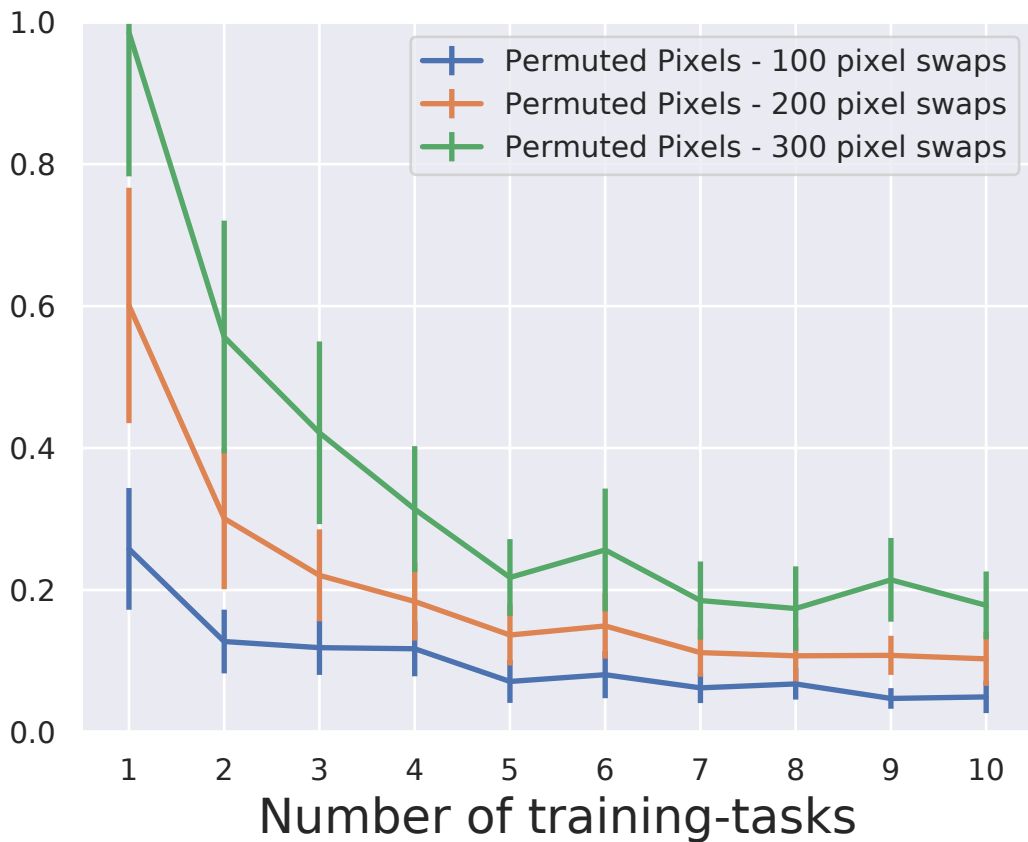

Supplement: supplementary_material [file attachment]

Bound on new task

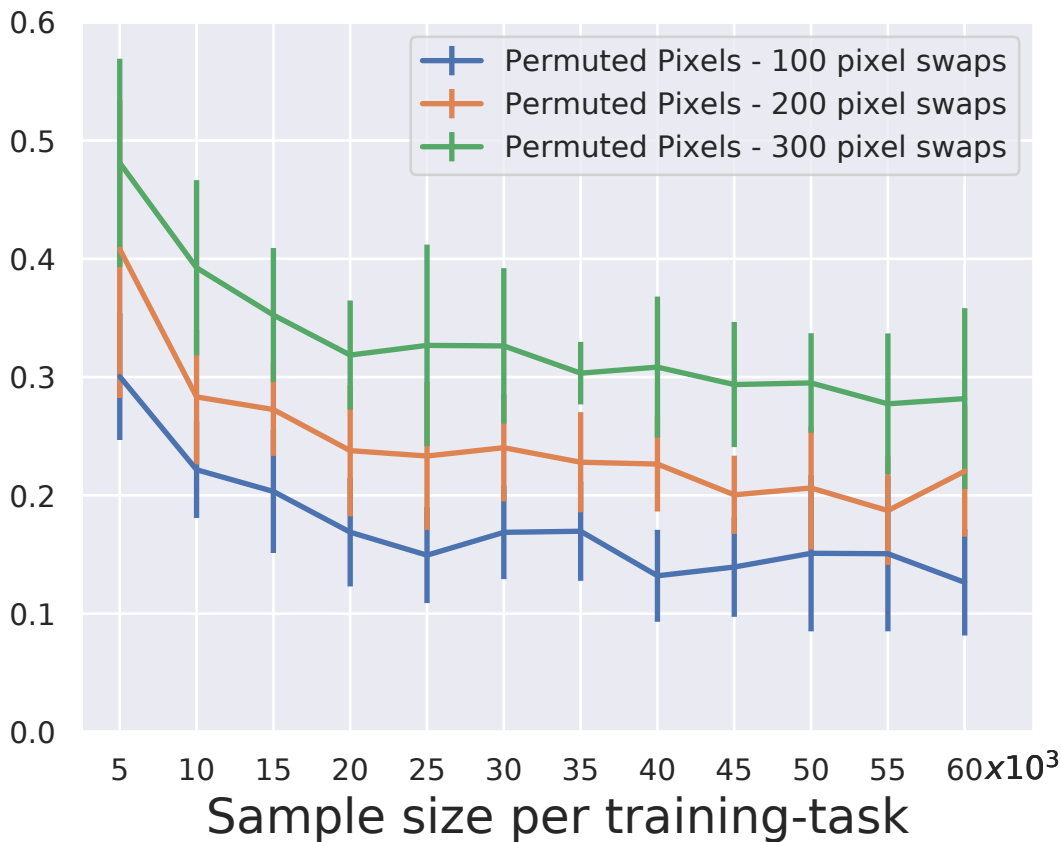

Supplement: supplementary_material [file attachment]

Error on new task [%]

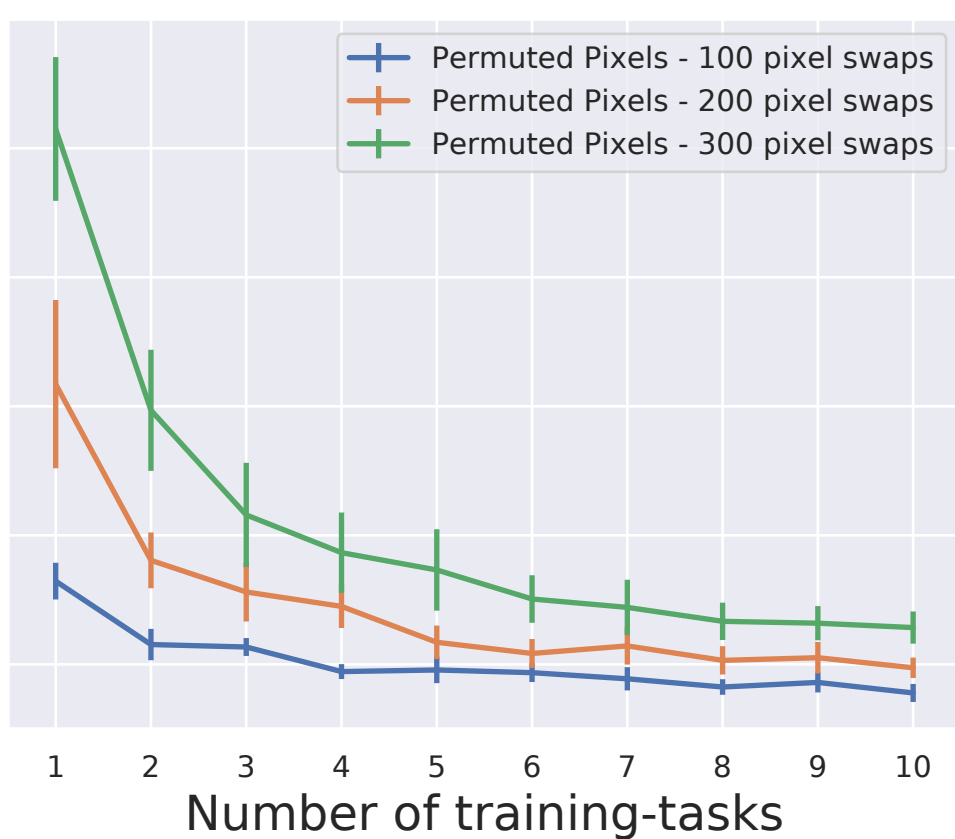

Supplement: supplementary_material [file attachment]

Error on new task [%]

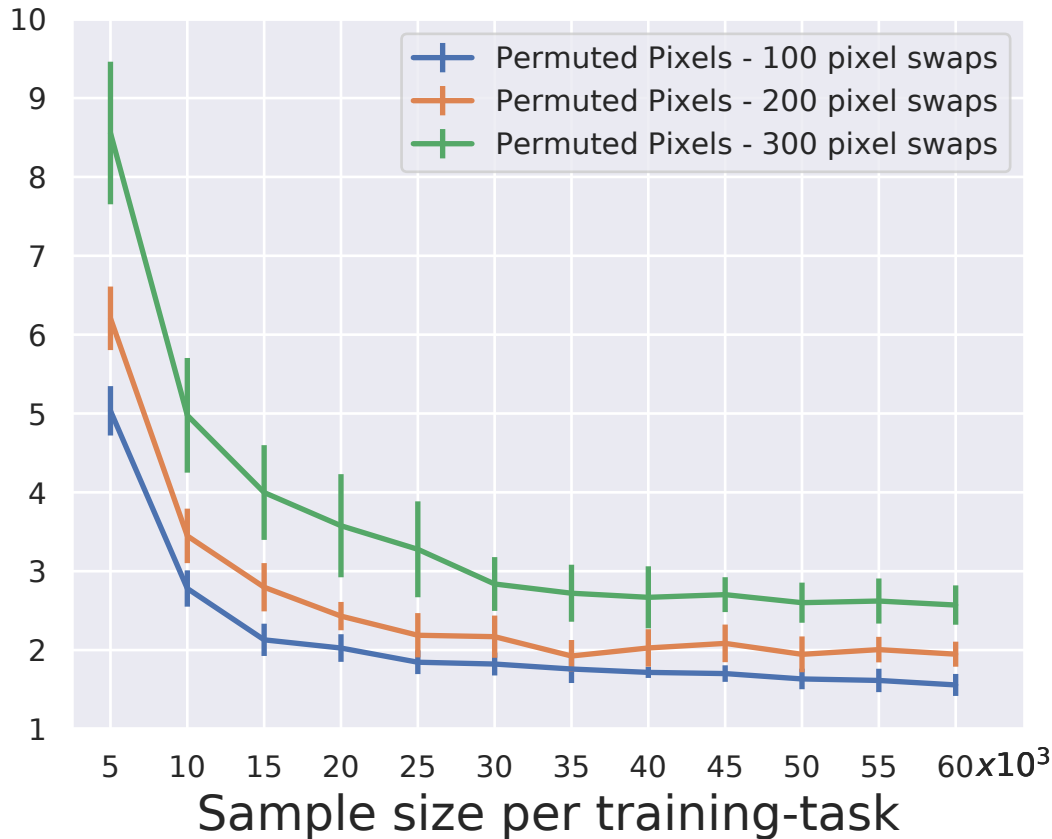

Supplement: supplementary_material [file attachment]

Error on new task [%]

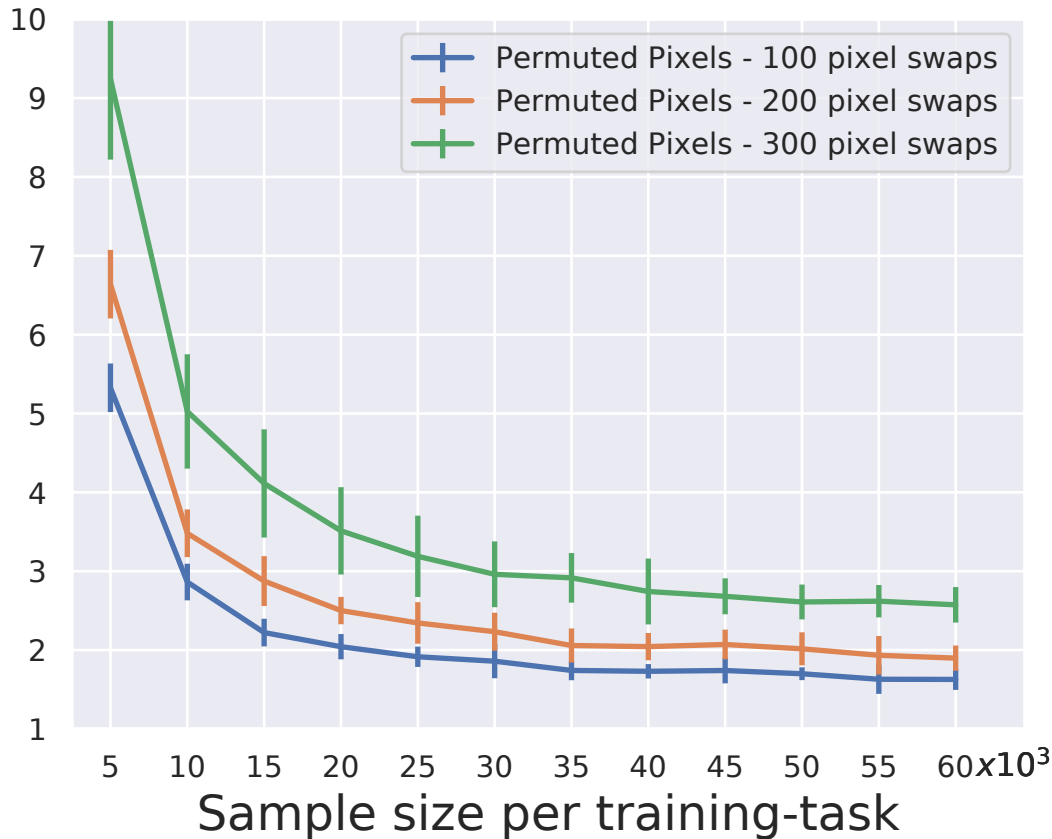

Supplement: supplementary_material [file attachment]

Error on new task [%]

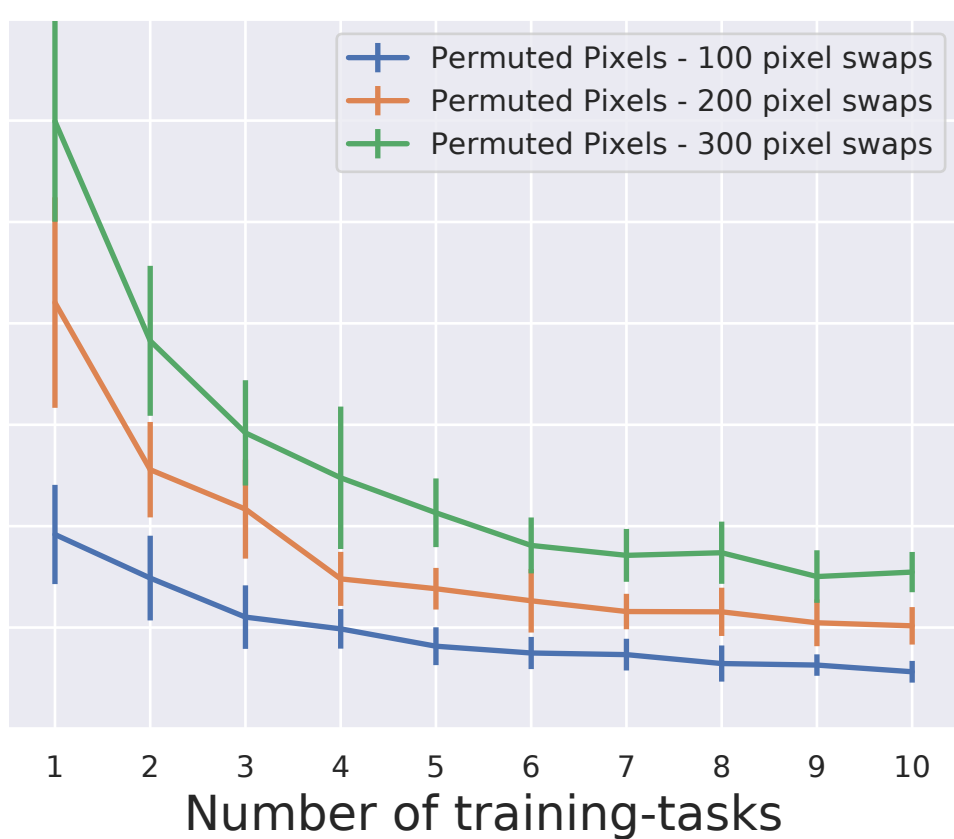

Supplement: supplementary_material [file attachment]

Bound on new task

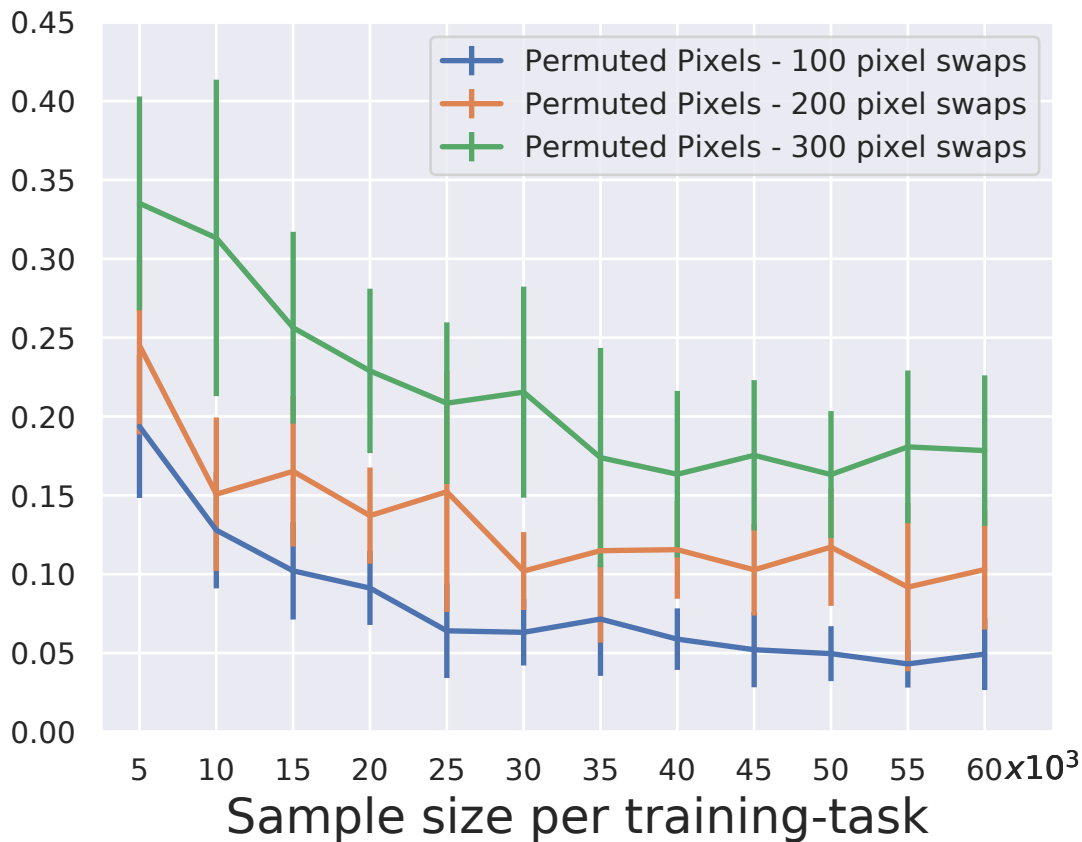

Supplement: supplementary_material [file attachment]

Bound on new task

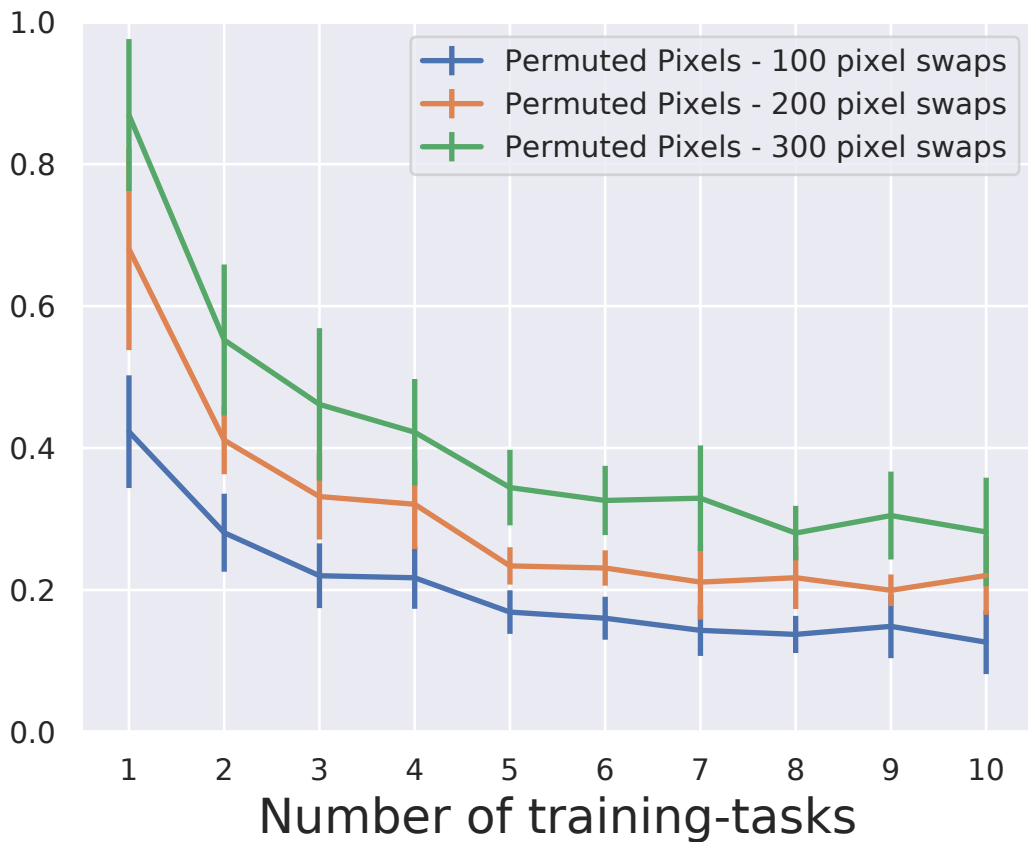

Supplement: supplementary_material [file attachment]

Bound on new task

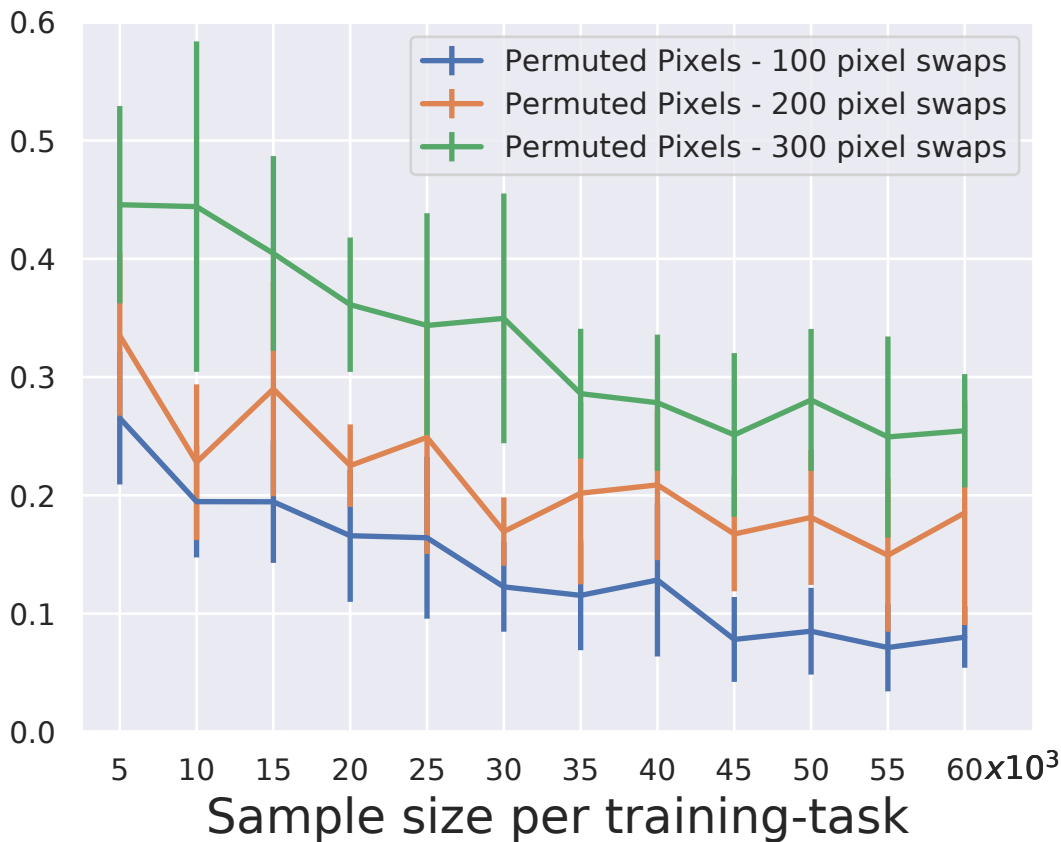

Supplement: supplementary_material [file attachment]

Error on new task [%]

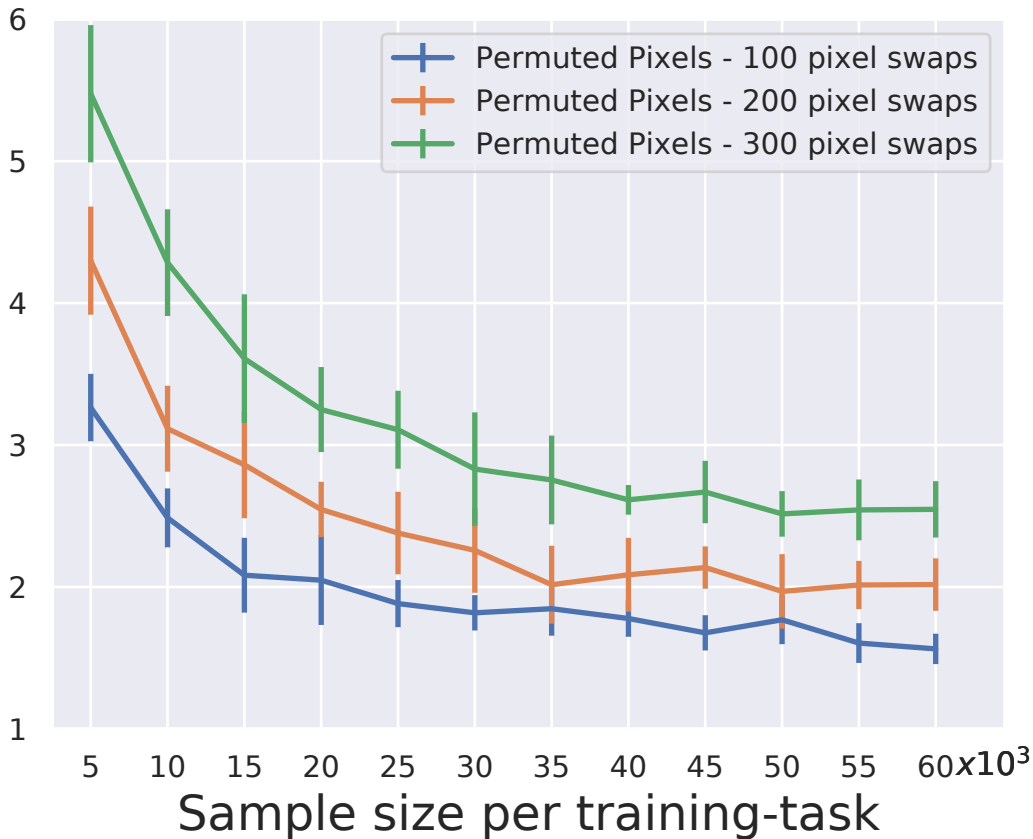

Supplement: supplementary_material [file attachment]
